# Supplementary material
Source: Royal Society of Chemistry journal article supplement (doi:10.1039/d6cp01071g)
Supplement: d6cp01071g1.pdf [file d6cp01071g1.pdf]

Electronic regulation of first-coordination-shell  
environments in Mn-based single-atom sites for  
electrochemical NO reduction: A density functional  
theory study

Hong Wang, Zian Gu, Ziheng Wang, Shulin Sun, Jinkun Bai, Kangrong Lai\*

*School of Physics and Materials Science, Changji University, Changji 831100, China.*

*E-mail: [laikr0212@163.com](mailto:laikr0212@163.com)*

$\text{MnN}_4$

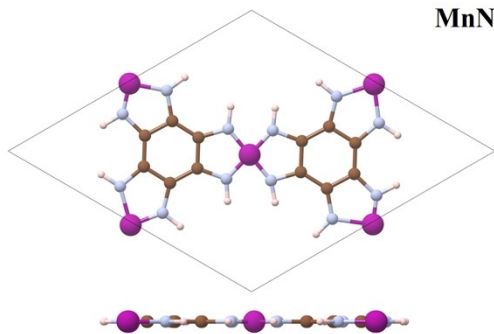

$\text{MnN}_2\text{O}_2$

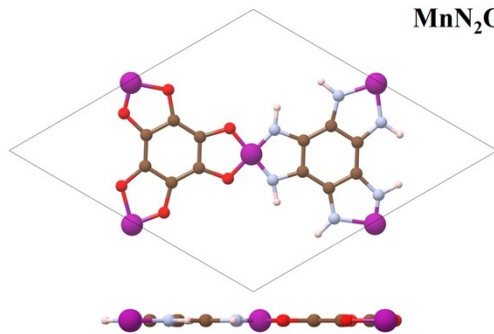

$\text{MnO}_4$

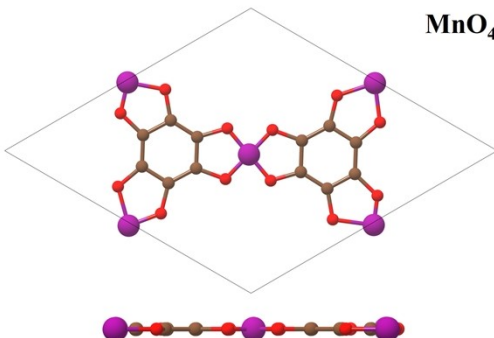

$\text{MnO}_2\text{S}_2$

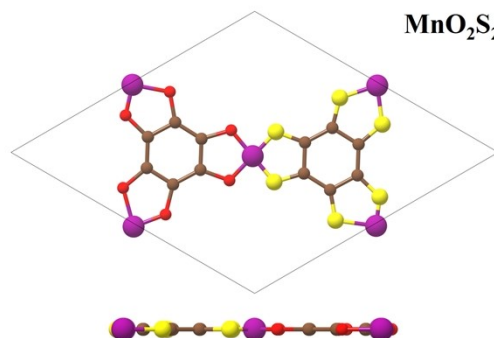

$\text{MnO}_2\text{Se}_2$

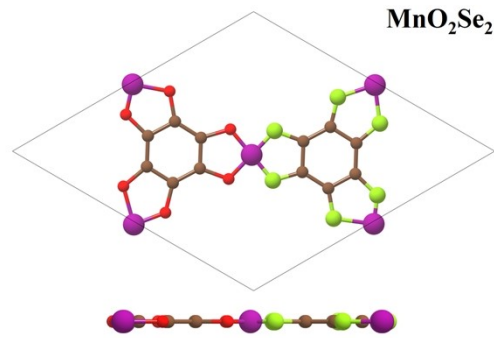

$\text{MnN}_2\text{Se}_2$

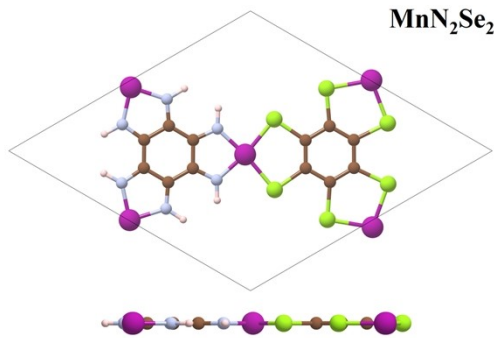

$\text{MnSe}_4$

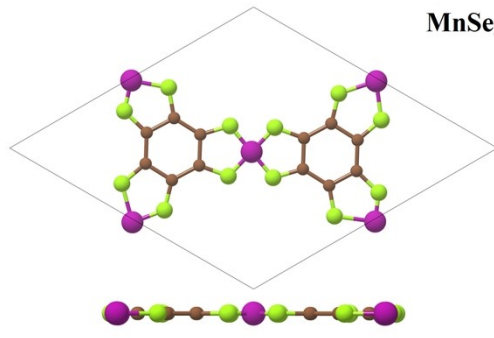

$\text{MnN}_2\text{S}_2$

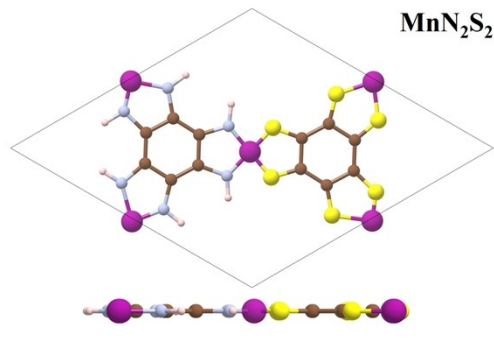

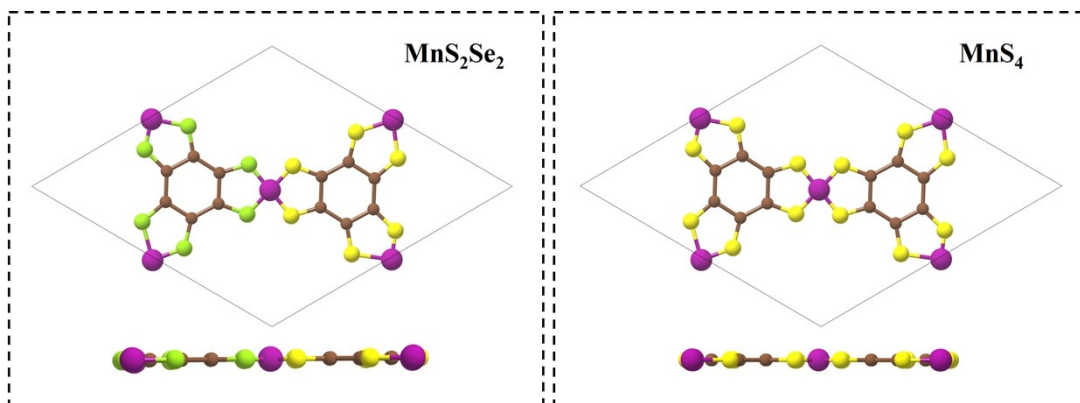

**Fig. S1** Front and side views of ten different catalysts.

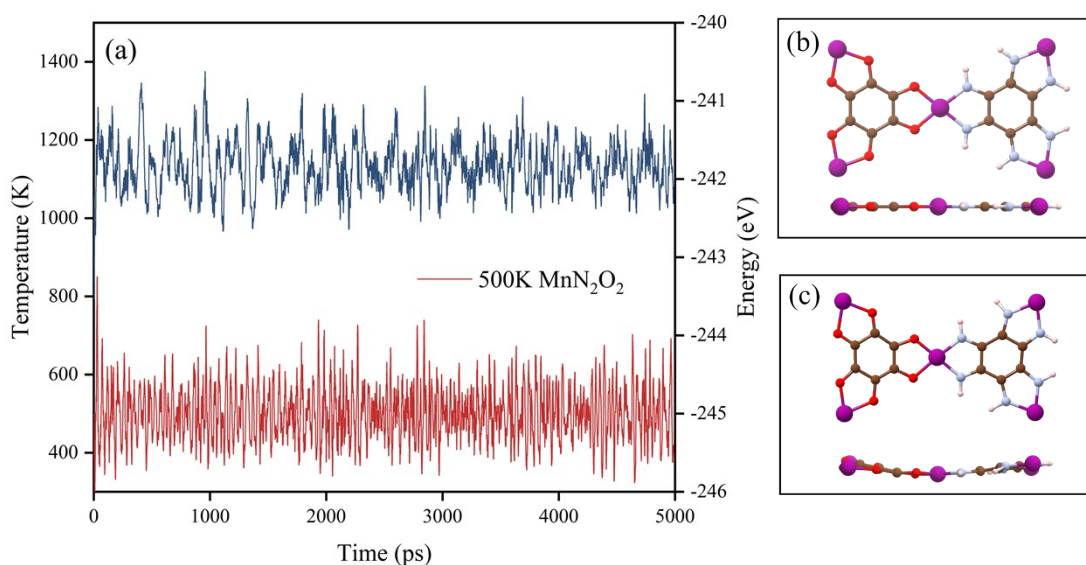

**Fig. S2** (a) AIMD trajectory distribution of  $\text{MnN}_2\text{O}_2$ . (b–c) Top and side views of the structure before and after the AIMD simulation, respectively.

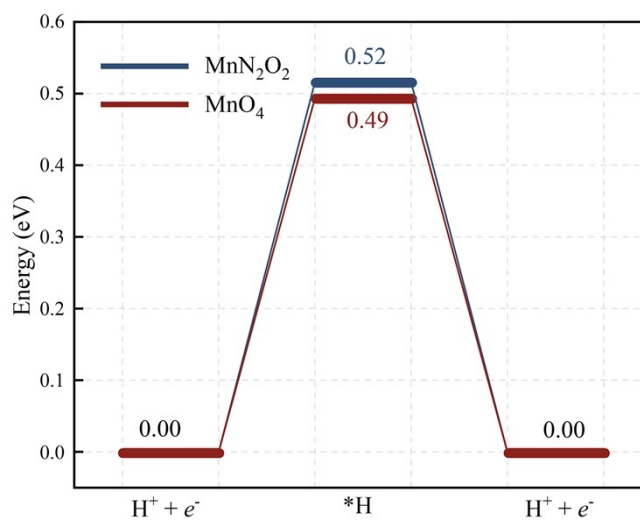

**Fig. S3** Free energy step diagram for the HER competitive reaction.

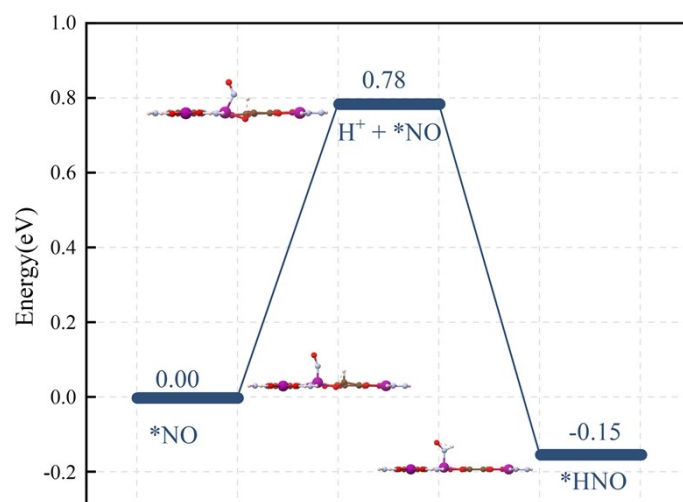

**Fig. S4** Kinetic energy barrier diagram for the first-step protonation process of NO in the  $\text{MnN}_2\text{O}_2$  system.

**Table S1**  $\text{MnN}_2\text{O}_2$ ,  $\text{MnN}_4$ ,  $\text{MnN}_2\text{S}_2$ ,  $\text{MnO}_4$ ,  $\text{MnS}_4$ ,  $\text{MnO}_2\text{S}_2$ ,  $\text{MnN}_2\text{Se}_2$ ,  $\text{MnS}_2\text{Se}_2$ ,  $\text{MnO}_2\text{Se}_2$  electronic properties of the structures, thermodynamic stability, and electrochemical descriptors.

| Structure                 | $Q_{\text{Mn}}$ (e) | $Q_{\text{sum(A/B)}}$ (e) | $M_{\text{Mn}}$ ( $\mu_{\text{B}}$ ) | $E_f$ (eV) | $U_{\text{diss}}$ (V) |
|---------------------------|---------------------|---------------------------|--------------------------------------|------------|-----------------------|
| $\text{MnN}_4$            | 1.41                | -4.95                     | 3.08                                 | -3.72      | 0.67                  |
| $\text{MnN}_2\text{O}_2$  | 1.50                | -4.55                     | 3.25                                 | -3.79      | 0.70                  |
| $\text{MnN}_2\text{S}_2$  | 1.27                | -2.97                     | 3.28                                 | -3.79      | 0.71                  |
| $\text{MnN}_2\text{Se}_2$ | 1.18                | -2.76                     | 3.35                                 | -3.06      | 0.34                  |
| $\text{MnO}_4$            | 1.58                | -4.09                     | 3.33                                 | -3.44      | 0.53                  |
| $\text{MnO}_2\text{S}_2$  | 1.34                | -2.45                     | 3.38                                 | -3.46      | 0.54                  |
| $\text{MnO}_2\text{Se}_2$ | 1.25                | -2.21                     | 3.46                                 | -2.77      | 0.19                  |
| $\text{MnS}_4$            | 1.11                | -0.72                     | 3.35                                 | -3.50      | 0.56                  |
| $\text{MnS}_2\text{Se}_2$ | 1.02                | -0.51                     | 3.39                                 | -2.81      | 0.22                  |
| $\text{MnSe}_4$           | 0.95                | -0.32                     | 3.44                                 | -2.12      | -0.13                 |
